# Supplementary material for: Molecular diet analysis enables detection of diatom and cyanobacteria DNA in the gut of Macoma balthica
Source: PLOS journal article supplement (doi:10.1371/journal.pone.0278070), 2022-11-23

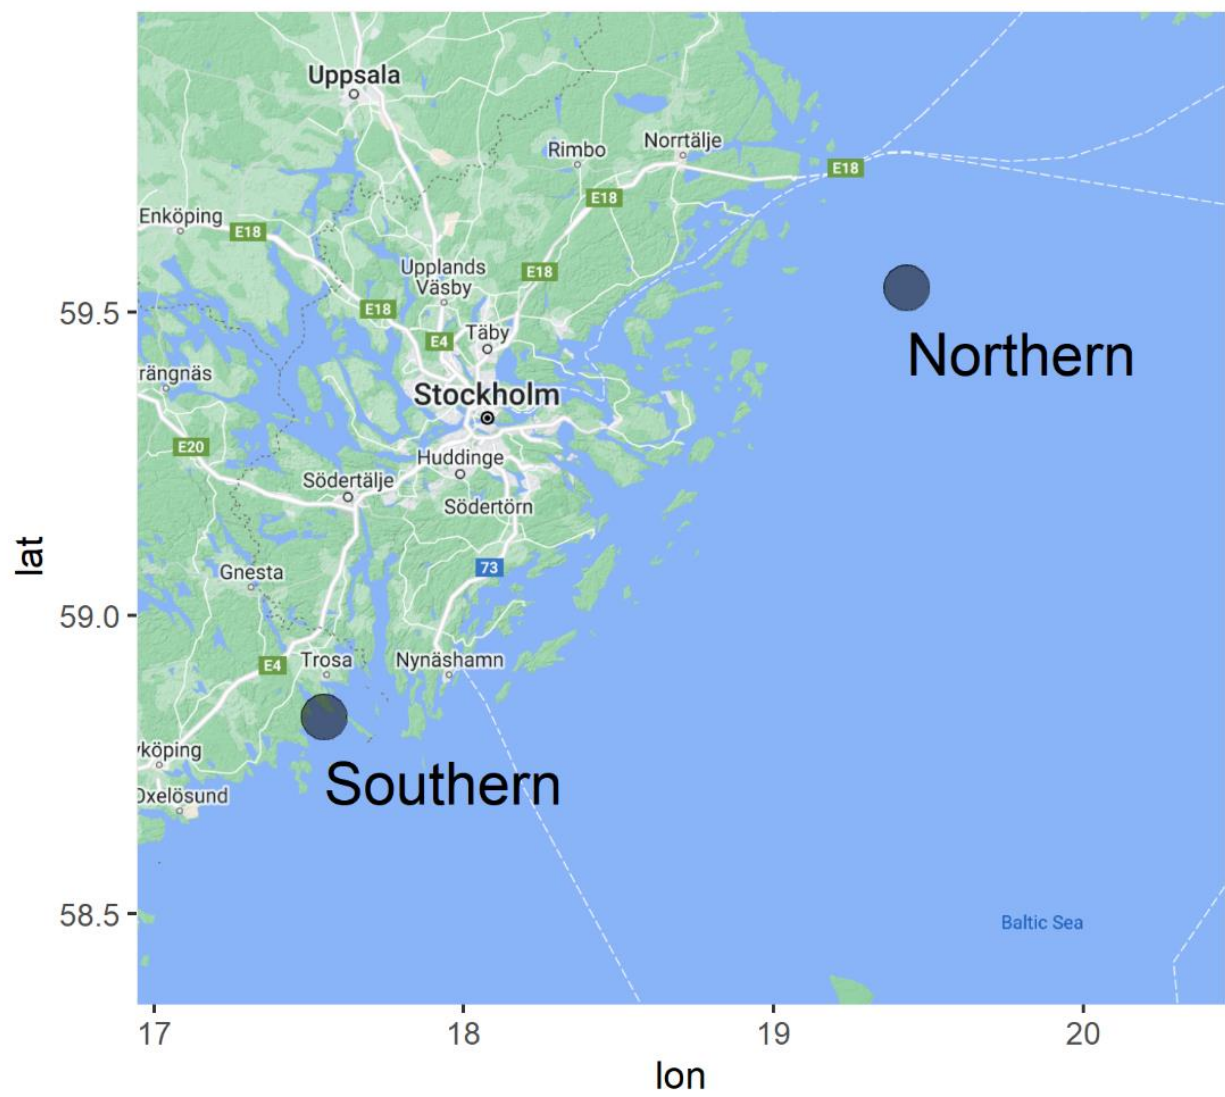

Supplement: S1 (10.1371/journal.pone.0278070.s001) [file journal.pone.0278070.s001]
